# Supplementary material for: Strategies for Wheat Stripe Rust Pathogenicity Identified by Transcriptome Sequencing
Source: PLoS One. 2013 Jun 26;8(6):e67150. doi: 10.1371/journal.pone.0067150 (PMC3694141; doi:10.1371/journal.pone.0067150)
Supplement: Table S4 — Transporters. Transcripts encoding proteins with similarities to different transporter categories were identified by BLASTx against the NCBI-nr protein database and the Transport Classification Database (TCDB). Expression levels based on Illumina data are presented (RPKM values, green for haustoria and orange for germinated spores). (XLSX) [file pone.0067150.s008.xlsx]

## Sheet: TS4 Transporters
Category	Transcript ID	Description	RPKM-HAUS	RPKM-SPORES	Differentially expressed	Comment 1	Comment 2	E-val best hit, BLASTx NCBI-nr	Accession best hit, BLASTx NCBI-nr	Description best hit, BLASTx NCBI-nr	Greatest alignment length best hit, BLASTx NCBI-nr	E-val best hit, BLASTx vs Transporters DB	Description best hit, BLASTx vs Transporters Database	Greatest alignment length best hit, BLASTx Transporters Database
AA AND OLIGOPEPTIDES TRANSPORTERS
	PST79_1706	amino acid transporter	1464.49	0.36	HAUS	Similar to AAT2p Uromyces		0	EFP91169	hypothetical protein PGTG_16914 [Puccinia graminis f. sp. tritici CRL 75-36-700-3]	560	3.18e-90	General amino acid permease 1 OS=Hebeloma cylindrosporum GN=GAP1 PE=2 SV=1	579
	PST79_2986	amino acid transporter	168.76	1.66	HAUS	Similar to AAT3 Uromyces		0	EFP74359	AAT family amino acid transporter [Puccinia graminis f. sp. tritici CRL 75-36-700-3]	550	1.62e-107	Dicarboxylic amino acid permease OS=Saccharomyces cerevisiae (strain ATCC 204508 / S288c) GN=DIP5 PE=1 SV=1	558
	PST79_2586	amino acid transporter	293.37	0.12	HAUS	Similar to AAT1p Uromyces		0	EFP81405	hypothetical protein PGTG_07026 [Puccinia graminis f. sp. tritici CRL 75-36-700-3]	527	3.71e-96	Dicarboxylic amino acid permease OS=Saccharomyces cerevisiae (strain ATCC 204508 / S288c) GN=DIP5 PE=1 SV=1	539
	PST79_9796	amino acid transporter	21.59	19.98				1.24e-93	XP_003329009	amino-acid permease inda1 [Puccinia graminis f. sp. tritici CRL 75-36-700-3]	170	3.65e-25	Lysine-specific permease OS=Saccharomyces cerevisiae (strain ATCC 204508 / S288c) GN=LYP1 PE=1 SV=2	173
	PST79_9797	amino acid transporter	1.43	12.25				7.6e-148	EFP84590	AAT family amino acid transporter [Puccinia graminis f. sp. tritici CRL 75-36-700-3]	257	1.93e-61	General amino acid permease 1 OS=Hebeloma cylindrosporum GN=GAP1 PE=2 SV=1	250
	PST79_3074	amino acid transporter/histidine permease	14.46	525.89	SPO	Putative histidine permease, aat3p		0	EFP89368	hypothetical protein PGTG_15547 [Puccinia graminis f. sp. tritici CRL 75-36-700-3]	594	3.39e-107	Dicarboxylic amino acid permease OS=Saccharomyces cerevisiae (strain ATCC 204508 / S288c) GN=DIP5 PE=1 SV=1	583
	PST79_10908	oligopeptide transporter	18.13	19.02				0	XP_003325153	oligopeptide transporter 4 [Puccinia graminis f. sp. tritici CRL 75-36-700-3]	395	9.08e-99	Uncharacterized oligopeptide transporter C29B12.10c OS=Schizosaccharomyces pombe (strain 972 / ATCC 24843) GN=SPAC29B12.10c PE=1 SV=1	376
	PST79_9468	oligopeptide transporter	139.5	0.04	HAUS			0	EFP81606	hypothetical protein PGTG_07855 [Puccinia graminis f. sp. tritici CRL 75-36-700-3]	676	4.1e-56	Oligopeptide transporter 9 OS=Arabidopsis thaliana GN=OPT9 PE=2 SV=1	602
	PST79_1656	oligopeptide transporter	192.52	8.13	HAUS			0	EFP91362	OPT family small oligopeptide transporter [Puccinia graminis f. sp. tritici CRL 75-36-700-3]	575	1.36e-114	Oligopeptide transporter 2 OS=Saccharomyces cerevisiae (strain ATCC 204508 / S288c) GN=OPT2 PE=1 SV=1	530
	PST79_6426	oligopeptide transporter	18.39	14.38				0	EGG08410	hypothetical protein MELLADRAFT_124190 [Melampsora larici-populina 98AG31]	618	4.4e-89	Oligopeptide transporter 9 OS=Arabidopsis thaliana GN=OPT9 PE=2 SV=1	571
	PST79_2988	oligopeptide transporter	27.01	117.16	SPO			0	EFP91623	hypothetical protein PGTG_17677 [Puccinia graminis f. sp. tritici CRL 75-36-700-3]	765	6.09e-54	Uncharacterized oligopeptide transporter C29B12.10c OS=Schizosaccharomyces pombe (strain 972 / ATCC 24843) GN=SPAC29B12.10c PE=1 SV=1	699
	PST79_8271	oligopeptide transporter	49.65	0.04	HAUS			0	EFP84727	hypothetical protein PGTG_10886 [Puccinia graminis f. sp. tritici CRL 75-36-700-3]	723	3.15e-50	Putative uncharacterized protein OS=Dictyostelium discoideum GN=DDB_0183975 PE=4 SV=1	683
	PST79_6898	OPT superfamily oligopeptide	17.69	10.07				8.11e-153	XP_003332194	hypothetical protein PGTG_13561 [Puccinia graminis f. sp. tritici CRL 75-36-700-3] >gi|309311184|gb|EFP87775.1| hypothetical protein PGTG_13561 [Puccinia graminis f. sp. tritici CRL 75-36-700-3]	238	2.96e-44	Putative uncharacterized protein OS=Dictyostelium discoideum GN=DDB_0183975 PE=4 SV=1	176
	PST79_7883	protein transport protein	73.49	51.09				6.2e-141	XP_003323757	protein transport protein SEC22 [Puccinia graminis f. sp. tritici CRL 75-36-700-3] >gi|309302747|gb|EFP79338.1| vesicle transporter SEC22 [Puccinia graminis f. sp. tritici CRL 75-36-700-3]	249
	PST79_659	putative oligopeptide transporter	5.94	14.28				0	EHS64211	hypothetical protein PGTG_22134 [Puccinia graminis f. sp. tritici CRL 75-36-700-3]	549	2.83e-32	Uncharacterized oligopeptide transporter C29B12.10c OS=Schizosaccharomyces pombe (strain 972 / ATCC 24843) GN=SPAC29B12.10c PE=1 SV=1	488
SUGAR TRANSPORTERS
	PST79_3519	GDP-mannose transporter	11.16	65.35	SPO			0	XP_003334499	GDP-mannose transporter [Puccinia graminis f. sp. tritici CRL 75-36-700-3] >gi|309313489|gb|EFP90080.1| hypothetical protein PGTG_15928 [Puccinia graminis f. sp. tritici CRL 75-36-700-3]	376	4.73e-105	GDP-mannose transporter OS=Candida albicans (strain SC5314 / ATCC MYA-2876) GN=VRG4 PE=3 SV=1	324
	PST79_2057	glucose transporter	27.46	104.69	SPO		MFS glucose transporter	1.13e-125	XP_003322460	glucose transporter [Puccinia graminis f. sp. tritici CRL 75-36-700-3] >gi|309301450|gb|EFP78041.1| hypothetical protein PGTG_03997 [Puccinia graminis f. sp. tritici CRL 75-36-700-3]	305	1.8e-33	Monosaccharide transporter OS=Geosiphon pyriformis GN=mst1 PE=3 SV=1	235
	PST79_113	glucose transporter	1492.24	0.47	HAUS	Similar to HXT1 Uromyces	MFS monosaccharide transporter	0	CAC41332	HXT1p [Uromyces viciae-fabae]	551	1.18e-108	Glucose/xylose symporter 1 OS=Candida intermedia GN=GXS1 PE=2 SV=1	491
	PST79_2930	glucose transporter	14.36	107.73	SPO	Similar to HXT1 and AmMst1, Amanita muscaria	MFS monosaccharide transporter	0	EFP88944	hypothetical protein PGTG_15147 [Puccinia graminis f. sp. tritici CRL 75-36-700-3]	531	1.92e-118	Glucose transporter/sensor OS=Scheffersomyces stipitis (strain ATCC 58785 / CBS 6054 / NBRC 10063 / NRRL Y-11545) GN=RGT2 PE=3 SV=1	485
	PST79_3624	sugar transporter	43.81	5.7	HAUS		MFS transporter	0	XP_003307533	membrane transporter [Puccinia graminis f. sp. tritici CRL 75-36-700-3] >gi|309297936|gb|EFP74527.1| hypothetical protein PGTG_00483 [Puccinia graminis f. sp. tritici CRL 75-36-700-3]	526	1.07e-23	Putative niacin/nicotinamide transporter NaiP OS=Bacillus subtilis GN=naiP PE=1 SV=1	487
	PST79_4676	sugar transporter	26.92	0.19	HAUS		MFS sugar transporter	0	EFP79170	hypothetical protein PGTG_05491 [Puccinia graminis f. sp. tritici CRL 75-36-700-3]	343	5.96e-72	Sugar/H+ symporter OS=Galdieria sulphuraria GN=SPT1 PE=2 SV=1	317
	PST79_441	sugar transporter, Hexose Carrier	10.45	98.3	SPO	Related to STL1	MFS sugar transporter	0	XP_003324392	sugar transporter [Puccinia graminis f. sp. tritici CRL 75-36-700-3] >gi|309303382|gb|EFP79973.1| hypothetical protein PGTG_05198 [Puccinia graminis f. sp. tritici CRL 75-36-700-3]	503	1.02e-84	Putative uncharacterized protein STL1 OS=Candida albicans (strain SC5314 / ATCC MYA-2876) GN=HGT10 PE=3 SV=1	493
	PST79_2314	sugar transporter SLT1	4.84	94.74	SPO	Similar to STL1	MFS monosaccharide transporter	0	EFP77337	hypothetical protein PGTG_03293 [Puccinia graminis f. sp. tritici CRL 75-36-700-3]	521	3.9e-90	Sugar transporter STL1 OS=Saccharomyces cerevisiae (strain ATCC 204508 / S288c) GN=STL1 PE=1 SV=2	470
	PST79_3247	sugar transporter	32.96	2.17	HAUS	Myoinositol transporter	MFS sugar transporter	0	EFP79174	hypothetical protein PGTG_05495 [Puccinia graminis f. sp. tritici CRL 75-36-700-3]	490	1.91e-72	Sugar/H+ symporter OS=Galdieria sulphuraria GN=SPT1 PE=2 SV=1	454
	PST79_1553	monosacharide transporter	6.75	457.94	SPO	Related to STL1	MFS monosaccharide transporter	0	XP_003325805	hypothetical protein PGTG_07007 [Puccinia graminis f. sp. tritici CRL 75-36-700-3]	573	3.06e-49	Putative uncharacterized protein STL1 OS=Candida albicans (strain SC5314 / ATCC MYA-2876) GN=HGT10 PE=3 SV=1	542
	PST79_3393	monosacharide transporter	12.88	32.42		Related to STL1	MFS monosaccharide transporter	0	EFP81288	hypothetical protein PGTG_06909 [Puccinia graminis f. sp. tritici CRL 75-36-700-3]	534	1.07e-65	Putative uncharacterized protein STL1 OS=Candida albicans (strain SC5314 / ATCC MYA-2876) GN=HGT10 PE=3 SV=1	514
	PST79_12581	oligosaccharide translocation protein	1.87	15.53		RFT1 family protein		9e-134	XP_003321000	oligosaccharide translocation protein RFT1 [Puccinia graminis f. sp. tritici CRL 75-36-700-3] >gi|309299990|gb|EFP76581.1| hypothetical protein PGTG_02042 [Puccinia graminis f. sp. tritici CRL 75-36-700-3]	461	6.39e-34	Oligosaccharide translocation protein RFT1 OS=Saccharomyces cerevisiae (strain ATCC 204508 / S288c) GN=RFT1 PE=1 SV=1	395
ABC TRANSPORTERS
	PST79_193	ABC transporter	22.72	16.32				0	EFP77205	hypothetical protein PGTG_03161 [Puccinia graminis f. sp. tritici CRL 75-36-700-3]	476	5.11e-44	Pleiotropic ABC efflux transporter of multiple drugs OS=Saccharomyces cerevisiae (strain ATCC 204508 / S288c) GN=PDR5 PE=1 SV=1	426
	PST79_7676	Fe/S cluster exporter	29.17	10.2		Potentially mitochondrial inner membrane		0	EFP81851	mitochondrial ABC transporter ATM [Puccinia graminis f. sp. tritici CRL 75-36-700-3]	299	3e-137	Iron-sulfur clusters transporter ATM1, mitochondrial OS=Saccharomyces cerevisiae (strain ATCC 204508 / S288c) GN=ATM1 PE=1 SV=2	325
	PST79_11360	ABC transporter	2.18	271.96	SPO			0	EFP88622	hypothetical protein PGTG_14827 [Puccinia graminis f. sp. tritici CRL 75-36-700-3]	1520	0	ABC transporter OS=Cryptococcus neoformans GN=AFR1 PE=2 SV=1	1520
	PST79_6302	ABC transporter	3.38	6.41				0	EFP88631	hypothetical protein PGTG_14836 [Puccinia graminis f. sp. tritici CRL 75-36-700-3]	615	0	ABC transporter OS=Cryptococcus neoformans GN=AFR1 PE=2 SV=1	591
	PST79_1491	ABC transporter	7.12	15.65				0	EFP89891	hypothetical protein PGTG_15847 [Puccinia graminis f. sp. tritici CRL 75-36-700-3]	593	2.59e-98	ATP-dependent bile acid permease OS=Saccharomyces cerevisiae (strain ATCC 204508 / S288c) GN=YBT1 PE=1 SV=2	541
	PST79_3376	ABC transporter	79.77	41.39				0	EFP92179	ABC transporter E family member 2 [Puccinia graminis f. sp. tritici CRL 75-36-700-3]	594	3.53e-20	PrbD ABC transporter ATP-binding protein, mediates the uptake of proline betaine at both high and low osmolarities OS=Rhizobium meliloti (strain 1021) GN=prbD PE=3 SV=1	545
	PST79_5626	ABC transporter	15.93	33.52		Similar to peroxisomal ABC transporter		0	XP_003326635	ABC transporter [Puccinia graminis f. sp. tritici CRL 75-36-700-3] >gi|309305625|gb|EFP82216.1| hypothetical protein PGTG_07613 [Puccinia graminis f. sp. tritici CRL 75-36-700-3]	350	3.15e-65	ATP-binding cassette sub-family D member 2 OS=Homo sapiens GN=ABCD2 PE=1 SV=1	282
	PST79_10409	ABC transporter	12.36	50.74	SPO			0	XP_003332031	ABC-2 type transporter [Puccinia graminis f. sp. tritici CRL 75-36-700-3] >gi|309311021|gb|EFP87612.1| hypothetical protein PGTG_13983 [Puccinia graminis f. sp. tritici CRL 75-36-700-3]	486	4.57e-133	Probable ATP-dependent permease OS=Saccharomyces cerevisiae (strain ATCC 204508 / S288c) GN=ADP1 PE=1 SV=2	389
	PST79_2347	ABC transporter	6.68	18.11		Similar to heavy metal tolerance protein		0	XP_003333523	ABC transporter [Puccinia graminis f. sp. tritici CRL 75-36-700-3]	303	3e-132	Heavy metal tolerance protein OS=Schizosaccharomyces pombe (strain 972 / ATCC 24843) GN=hmt1 PE=2 SV=3	358
	PST79_8820	ABC transporter	2.6	1.04		Similar to ABC drug exporter		3.98e-93	XP_003336046	ABC transporter CDR4 [Puccinia graminis f. sp. tritici CRL 75-36-700-3]	248	4.15e-18	Protein SNQ2 OS=Saccharomyces cerevisiae (strain ATCC 204508 / S288c) GN=SNQ2 PE=1 SV=2	246
	PST79_9392	ABC transporter	18.6	29.76				0	XP_003323051	ATP-binding cassette transporter [Puccinia graminis f. sp. tritici CRL 75-36-700-3]	281	9.75e-33	ABC transporter OS=Clostridium hathewayi GN=cmpA PE=4 SV=2	293
	PST79_132	ABC transporter	16.04	47.13	SPO	Similar to mammalian ABC bile acid transporter		0	EFP75547	hypothetical protein PGTG_00878 [Puccinia graminis f. sp. tritici CRL 75-36-700-3]	1054	7.6e-121	ATP-dependent bile acid permease OS=Saccharomyces cerevisiae (strain ATCC 204508 / S288c) GN=YBT1 PE=1 SV=2	926
Other MFS
	PST79_3945	MFS multidrug transporter	2.06	0.01				3.85e-90	XP_003327806	hypothetical protein PGTG_08573 [Puccinia graminis f. sp. tritici CRL 75-36-700-3]	278	9.52e-19	Benomyl/methotrexate resistance protein OS=Candida albicans GN=MDR1 PE=3 SV=1	271
	PST79_7841	MFS drug transporter	8.98	111.57	SPO			0	XP_003333416	hypothetical protein PGTG_15200 [Puccinia graminis f. sp. tritici CRL 75-36-700-3]	540	2.24e-46	Uncharacterized MFS-type transporter yusP OS=Bacillus subtilis GN=yusP PE=3 SV=1	503
	PST79_96	MFS polyamine transporter	25.04	0	HAUS			1.8e-115	EFP80738	hypothetical protein PGTG_06694 [Puccinia graminis f. sp. tritici CRL 75-36-700-3]	302	3.6e-33	Polyamine transporter 1 OS=Saccharomyces cerevisiae (strain ATCC 204508 / S288c) GN=TPO1 PE=1 SV=1	292
	PST79_11441	MFS transporter	0.74	64.77	SPO			0	EHS64577	hypothetical protein, variant [Puccinia graminis f. sp. tritici CRL 75-36-700-3]	439	3.19e-36	Phthalate transporter OS=Burkholderia cepacia GN=ophD PE=4 SV=1	451
	PST79_3438	MFS monocarboxylic acid transport	21.6	46.89	SPO			1.62e-161	XP_003328987	hypothetical protein PGTG_10727 [Puccinia graminis f. sp. tritici CRL 75-36-700-3] >gi|309307977|gb|EFP84568.1| hypothetical protein PGTG_10727 [Puccinia graminis f. sp. tritici CRL 75-36-700-3]	460
	PST79_8377	MFS general substrate transporter	4.32	26.23	SPO			0	EFP92018	hypothetical protein PGTG_17849 [Puccinia graminis f. sp. tritici CRL 75-36-700-3]	439
	PST79_3969	MFS transporter	8.9	265.7	SPO			0	EFP81651	MFS transporter, SHS family, lactate transporter [Puccinia graminis f. sp. tritici CRL 75-36-700-3]	484	7.74e-70	Carboxylic acid transporter protein homolog OS=Saccharomyces cerevisiae (strain ATCC 204508 / S288c) GN=JEN1 PE=1 SV=1	434
	PST79_8706	MFS transporter	50.82	106.46	SPO			0	EFP83691	hypothetical protein PGTG_09404 [Puccinia graminis f. sp. tritici CRL 75-36-700-3]	506	7.53e-28	Inorganic phosphate transporter 1 OS=Solanum tuberosum GN=PT1 PE=2 SV=1	490
	PST79_7181	MFS transporter	535.42	308.18				0	EFP80261	hypothetical protein PGTG_06217 [Puccinia graminis f. sp. tritici CRL 75-36-700-3]	516	4.76e-08	Bile acid transporter OS=Eubacterium sp. (strain VPI 12708) GN=baiG PE=3 SV=2	372
	PST79_224	MFS transporter	539.09	0.19	HAUS	related to monocarboxylate transporter		0	EFP86244	hypothetical protein PGTG_12200 [Puccinia graminis f. sp. tritici CRL 75-36-700-3]	431	5.37e-13	Monocarboxylate transporter 3 OS=Homo sapiens GN=SLC16A8 PE=2 SV=1	404
Phosphate transporters
	PST79_4938	mitochondrial phosphate carrier protein	1685.71	61.08	HAUS			0	XP_003307719	phosphate transporter [Puccinia graminis f. sp. tritici CRL 75-36-700-3] >gi|309298122|gb|EFP74713.1| hypothetical protein PGTG_00669 [Puccinia graminis f. sp. tritici CRL 75-36-700-3]	403	2.99e-69	Mitochondrial phosphate carrier protein 2 OS=Saccharomyces cerevisiae (strain ATCC 204508 / S288c) GN=PIC2 PE=1 SV=1	303
	PST79_3467	Inorganic phosphate transporter	6.84	33.46	SPO	phosphate/H+ symporter , related to PHO84		0	XP_003319743	inorganic phosphate transporter 1-7/Pi cotransporter [Puccinia graminis f. sp. tritici CRL 75-36-700-3] >gi|309298733|gb|EFP75324.1| MFS transporter, PHS family, inorganic phosphate transporter [Puccinia graminis f. sp. tritici CRL 75-36-700-3]	538	3.27e-141	Inorganic phosphate transporter PHO84 OS=Neurospora crassa (strain ATCC 24698 / 74-OR23-1A / CBS 708.71 / DSM 1257 / FGSC 987) GN=NCU08325 PE=4 SV=2	523
	PST79_8877	Low-affinity phosphate transporter	3.63	20.83		SPX domain-containing protein, related to PHO91	MFS inorganic phosphate transport	0	XP_003329863	phosphate transporter [Puccinia graminis f. sp. tritici CRL 75-36-700-3]	379	5.05e-65	Low-affinity phosphate transporter PHO91 OS=Saccharomyces cerevisiae (strain ATCC 204508 / S288c) GN=PHO91 PE=1 SV=2	353
	PST79_11745	Inorganic phosphate transporter	1.77	135.05	SPO	Similar to PHO84	MFS transporter	0	EFP78191	hypothetical protein PGTG_04147 [Puccinia graminis f. sp. tritici CRL 75-36-700-3]	527	1.42e-58	Inorganic phosphate transporter PHO84 OS=Saccharomyces cerevisiae (strain ATCC 204508 / S288c) GN=PHO84 PE=1 SV=2	509
sulphate transporters
	PST79_8827		12.42	40.17	SPO			0	XP_003332812	sulphate transporter [Puccinia graminis f. sp. tritici CRL 75-36-700-3]	536	1.55e-31	Proton/sulfate transporter OS=Chlamydomonas reinhardtii GN=SULTR2 PE=2 SV=1	475
	PST79_3132	S-methylmethionine permease 1	155.54	0.69	HAUS			0	EFP89370	hypothetical protein PGTG_15549 [Puccinia graminis f. sp. tritici CRL 75-36-700-3]	484	3.01e-92	Dicarboxylic amino acid permease OS=Saccharomyces cerevisiae (strain ATCC 204508 / S288c) GN=DIP5 PE=1 SV=1	496
Ion transporters
	PST79_3206	Copper transporter	26.64	21.21				1.54e-105	EHS64799	hypothetical protein PGTG_21057 [Puccinia graminis f. sp. tritici CRL 75-36-700-3]	225	8.03e-07	CTR type copper ion transporter OS=Chlamydomonas reinhardtii GN=CTR1 PE=2 SV=1	186
	PST79_9341	Iron permease	5.79	1.86				2.08e-96	EHS63630	hypothetical protein PGTG_21721 [Puccinia graminis f. sp. tritici CRL 75-36-700-3]	215	6.28e-39	High-affinity iron permease CaFTR1, putative OS=Cryptococcus neoformans var. neoformans serotype D (strain JEC21 / ATCC MYA-565) GN=CNC05700 PE=4 SV=1	199
	PST79_4284	Magnesium transporter	35.86	65.69		Similar to related to MNR2-Manganese resist		0	EFP92323	hypothetical protein PGTG_17997 [Puccinia graminis f. sp. tritici CRL 75-36-700-3]	359	1.16e-95	Magnesium transporter ALR1 OS=Saccharomyces cerevisiae (strain ATCC 204508 / S288c) GN=ALR1 PE=1 SV=1	346
	PST79_6929	Manganese transporter	11.31	22.32				2.87e-156	EHS62681	hypothetical protein PGTG_21189 [Puccinia graminis f. sp. tritici CRL 75-36-700-3]	287	2.52e-50	Iron transporter SMF3 OS=Saccharomyces cerevisiae (strain ATCC 204508 / S288c) GN=SMF3 PE=1 SV=1	194
	PST79_9148	Manganese transporter	96.64	0.04	HAUS	Similar to smf Mn2+ and Fe2+ transporter		0	EFP84935	hypothetical protein PGTG_10406 [Puccinia graminis f. sp. tritici CRL 75-36-700-3]	585	1.18e-71	Manganese transporter SMF2 OS=Saccharomyces cerevisiae (strain ATCC 204508 / S288c) GN=SMF2 PE=2 SV=1	505
	PST79_10399	manganese transporter smf1	11.66	24.7		Similar to smf Mn2+ and Fe2+ transporter		0	EHS62600	hypothetical protein PGTG_22574 [Puccinia graminis f. sp. tritici CRL 75-36-700-3]	405	1.98e-32	Manganese transporter SMF1 OS=Saccharomyces cerevisiae (strain ATCC 204508 / S288c) GN=SMF1 PE=1 SV=2	306
	PST79_4745	High-affinity potassium transport protein OS=Saccharomyces cerevisiae (strain ATCC 204508 / S288c) GN=TRK1 PE=1 SV=1	7.66	20.7				2.33e-71	GAA24235	K7_Trk1bp [Saccharomyces cerevisiae Kyokai no. 7]	342	2.66e-65	High-affinity potassium transport protein OS=Saccharomyces cerevisiae (strain ATCC 204508 / S288c) GN=TRK1 PE=1 SV=1	298
	PST79_6508	Potassium transporter	13.54	139.08	SPO			0	XP_003325997	potassium transporter 8 [Puccinia graminis f. sp. tritici CRL 75-36-700-3]	452	2.17e-11	Potassium transporter OS=Neurospora crassa GN=hak-1 PE=4 SV=1	139
	PST79_11667	Potassium transporter	0.52	83.92	SPO			0	EFP81578	hypothetical protein PGTG_07827 [Puccinia graminis f. sp. tritici CRL 75-36-700-3]	483	8.04e-83	Putative high-affinity potassium transporter OS=Hordeum vulgare var. distichum GN=HvHAK1 PE=2 SV=2	483
	PST79_1137	Zinc transporter	94.35	15.42	HAUS			4.96e-94	CBQ71396	related to zinc transporter [Sporisorium reilianum SRZ2]	409	3.74e-67	Zinc transporter 5 OS=Homo sapiens GN=SLC30A5 PE=1 SV=1	358
	PST79_8091	Zinc ion transporter	15.23	0.02				7.92e-138	EHS64117	hypothetical protein, variant [Puccinia graminis f. sp. tritici CRL 75-36-700-3]	254	6.75e-34	Zinc-regulated transporter 1 OS=Saccharomyces cerevisiae (strain ATCC 204508 / S288c) GN=ZRT1 PE=2 SV=1	151
	PST79_5696	High-affinity cell membrane calcium channel	10.89	16.8				0	EFP81922	hypothetical protein PGTG_08171 [Puccinia graminis f. sp. tritici CRL 75-36-700-3]	528	1.27e-107	High-affinity cell membrane calcium channel OS=Cryptococcus neoformans var. grubii GN=CCH1 PE=4 SV=1	477
	PST79_4204	Putative Vacuolar calcium ion transporter, Vcx1	46.44	472.62	SPO			0	XP_003332607	hypothetical protein PGTG_14272 [Puccinia graminis f. sp. tritici CRL 75-36-700-3]	421	8.41e-55	Vacuolar calcium ion transporter OS=Saccharomyces cerevisiae (strain ATCC 204508 / S288c) GN=VCX1 PE=1 SV=1	356
nicotinic acid transporters
	PST79_362	Possible nicotinic acid transporter	186.26	14.32	HAUS		MFS transporter	0	XP_003326818	hypothetical protein PGTG_08355 [Puccinia graminis f. sp. tritici CRL 75-36-700-3]	515	1.27e-42	High-affinity nicotinic acid transporter OS=Saccharomyces cerevisiae (strain ATCC 204508 / S288c) GN=TNA1 PE=1 SV=1	429
	PST79_7845	Possible nicotinic acid transporter	9.66	35.2	SPO		MFS transporter	0	EFP81418	hypothetical protein PGTG_07039 [Puccinia graminis f. sp. tritici CRL 75-36-700-3]	531	1.14e-41	High-affinity nicotinic acid transporter OS=Saccharomyces cerevisiae (strain ATCC 204508 / S288c) GN=TNA1 PE=1 SV=1	430
	PST79_4348	Possible nicotinic acid transporter	4.85	0.08			MFS transporter	4.5e-161	EFP82334	hypothetical protein PGTG_08290 [Puccinia graminis f. sp. tritici CRL 75-36-700-3]	295	8.73e-36	High-affinity nicotinic acid transporter OS=Saccharomyces cerevisiae (strain ATCC 204508 / S288c) GN=TNA1 PE=1 SV=1	268
	PST79_3107	Possible nicotinic acid transporter	49.32	88.87			MFS transporter	0	XP_003329180	hypothetical protein PGTG_10920 [Puccinia graminis f. sp. tritici CRL 75-36-700-3]	525	1.88e-33	High-affinity nicotinic acid transporter OS=Saccharomyces cerevisiae (strain ATCC 204508 / S288c) GN=TNA1 PE=1 SV=1	234
ATPases
	PST79_1028	p-type	208.91	439.89	SPO	H+ ATPase	PMA1	0	XP_003330958	plasma membrane ATPase 1 [Puccinia graminis f. sp. tritici CRL 75-36-700-3] >gi|309309948|gb|EFP86539.1| H+-transporting ATPase [Puccinia graminis f. sp. tritici CRL 75-36-700-3]	933	0	ATPase 6, plasma membrane-type OS=Arabidopsis thaliana GN=AHA6 PE=2 SV=1	848
	PST79_343	p-type	152.77	377.51	SPO	H+ ATPase	PMA1	0	XP_003330958	plasma membrane ATPase 1 [Puccinia graminis f. sp. tritici CRL 75-36-700-3] >gi|309309948|gb|EFP86539.1| H+-transporting ATPase [Puccinia graminis f. sp. tritici CRL 75-36-700-3]	933	0	ATPase 6, plasma membrane-type OS=Arabidopsis thaliana GN=AHA6 PE=2 SV=1	848
	PST79_4481	p-type	9.22	47.31	SPO	H+ ATPase	PMA1	0	EGG01935	hypothetical protein MELLADRAFT_75544 [Melampsora larici-populina 98AG31]	964	0	ATPase 6, plasma membrane-type OS=Arabidopsis thaliana GN=AHA6 PE=2 SV=1	886
	PST79_12095	p-type	1.5	13.49		Calcium transporting ATPase		0	XP_003322729	calcium-transporting P-type ATPase [Puccinia graminis f. sp. tritici CRL 75-36-700-3] >gi|309301719|gb|EFP78310.1| Ca2+-transporting ATPase [Puccinia graminis f. sp. tritici CRL 75-36-700-3]	452	4.48e-89	Calcium-transporting ATPase 1 OS=Saccharomyces cerevisiae (strain ATCC 204508 / S288c) GN=PMR1 PE=1 SV=1	421
	PST79_3731	p-type	73.5	57.99		Calcium transporting ATPase		0	XP_003327868	calcium-translocating P-type ATPase [Puccinia graminis f. sp. tritici CRL 75-36-700-3]	1011	0	Sarcoplasmic/endoplasmic reticulum calcium ATPase 2 OS=Homo sapiens GN=ATP2A2 PE=1 SV=1	1036
	PST79_6092	p-type	44.52	42.11		Calcium transporting ATPase		0	XP_003320022	plasma membrane calcium-transporting ATPase 2 [Puccinia graminis f. sp. tritici CRL 75-36-700-3]	286	2.46e-91	Calcium-transporting ATPase PAT1 OS=Dictyostelium discoideum GN=patA PE=2 SV=2	235
	PST79_6093	p-type	4.65	36.48	SPO	Calcium transporting ATPase		6.85e-107	EFP75603	hypothetical protein PGTG_00934 [Puccinia graminis f. sp. tritici CRL 75-36-700-3]	214	1.97e-25	Calcium-transporting ATPase PAT1 OS=Dictyostelium discoideum GN=patA PE=2 SV=2	204
	PST79_1189	p-type	2.54	26.14	SPO	Calcium transporting ATPase		9.59e-94	EGG04963	hypothetical protein MELLADRAFT_48992 [Melampsora larici-populina 98AG31]	248	3.45e-26	Calcium-transporting ATPase 2 OS=Saccharomyces cerevisiae (strain ATCC 204508 / S288c) GN=PMC1 PE=1 SV=1	153
	PST79_11299	p-type	2.77	15.67		Calcium transporting ATPase		3.6e-86	XP_003322729	calcium-transporting P-type ATPase [Puccinia graminis f. sp. tritici CRL 75-36-700-3] >gi|309301719|gb|EFP78310.1| Ca2+-transporting ATPase [Puccinia graminis f. sp. tritici CRL 75-36-700-3]	117	1.01e-53	Putative calcium P-type ATPase (Fragment) OS=Neurospora crassa GN=pmr1 PE=3 SV=1	131
	PST79_4589	p-type	5.57	69.55	SPO	copper-transporting ATPase		0	XP_003334227	copper-transporting ATPase 1 [Puccinia graminis f. sp. tritici CRL 75-36-700-3] >gi|309313217|gb|EFP89808.1| hypothetical protein PGTG_15764 [Puccinia graminis f. sp. tritici CRL 75-36-700-3]	685	8.21e-159	Copper-transporting ATPase 1 OS=Homo sapiens GN=ATP7A PE=1 SV=3	659
	PST79_9186	p-type	191.11	689.78	SPO	Na/K ATPase		4.32e-109	XP_003321596	P-type cation-transporting ATPase [Puccinia graminis f. sp. tritici CRL 75-36-700-3]	215	0.00248	Sodium/potassium-transporting ATPase subunit alpha-3 OS=Homo sapiens GN=ATP1A3 PE=1 SV=3	159
	PST79_9183	p-type	30.26	892.57	SPO	Na/K ATPase		0	EFP77177	hypothetical protein PGTG_03133 [Puccinia graminis f. sp. tritici CRL 75-36-700-3]	972	7.09e-168	Potassium-transporting ATPase alpha chain 2 OS=Rattus norvegicus GN=Atp12a PE=1 SV=1	850
	PST79_9255	p-type	14	21.18		phospholipid-translocating ATPase		0	EFP81187	phospholipid-translocating ATPase [Puccinia graminis f. sp. tritici CRL 75-36-700-3]	529	2.67e-160	Calcium transporting ATPase, putative OS=Cryptococcus neoformans var. neoformans serotype D (strain JEC21 / ATCC MYA-565) GN=CNA03720 PE=4 SV=1	497
	PST79_881	p-type	1.44	0.04		phospholipid-translocating ATPase		4.25e-126	XP_003323141	P-type ATPase [Puccinia graminis f. sp. tritici CRL 75-36-700-3]	246	2.07e-44	Phospholipid-transporting ATPase DNF1 OS=Saccharomyces cerevisiae (strain ATCC 204508 / S288c) GN=DNF1 PE=1 SV=2	242
	PST79_6724	p-type	11.57	11.12		phospholipid-transporting ATPase		0	EFP84901	phospholipid-translocating ATPase [Puccinia graminis f. sp. tritici CRL 75-36-700-3]	339	6.45e-51	Probable phospholipid-transporting ATPase IA OS=Bos taurus GN=ATP8A1 PE=1 SV=2	340
	PST79_6592	p-type	0.72	3.84		phospholipid-transporting p-type ATPase		8.53e-118	EFP82319	hypothetical protein PGTG_07716 [Puccinia graminis f. sp. tritici CRL 75-36-700-3]	204	7.4e-60	Phospholipid-transporting ATPase DNF2 OS=Saccharomyces cerevisiae (strain ATCC 204508 / S288c) GN=DNF2 PE=1 SV=1	200
	PST79_2409	p-type	0.18	4.5		phospholipid-transporting p-type ATPase		3.74e-107	XP_003326738	P-type ATPase [Puccinia graminis f. sp. tritici CRL 75-36-700-3]	180	4.37e-37	Phospholipid-transporting ATPase DNF1 OS=Saccharomyces cerevisiae (strain ATCC 204508 / S288c) GN=DNF1 PE=1 SV=2	179
	PST79_1454	p-type	1.88	11.73		phospholipid-transporting p-type ATPase		8.75e-105	EFP81187	phospholipid-translocating ATPase [Puccinia graminis f. sp. tritici CRL 75-36-700-3]	203	2.36e-59	Calcium transporting ATPase, putative OS=Cryptococcus neoformans var. neoformans serotype D (strain JEC21 / ATCC MYA-565) GN=CNA03720 PE=4 SV=1	223
	PST79_7119	v-type	12.05	54.39	SPO	Vacuolar (H+)-ATPase		0	EFP86846	V-type H+-transporting ATPase subunit I [Puccinia graminis f. sp. tritici CRL 75-36-700-3]	609	1.28e-161	V-type proton ATPase subunit a, vacuolar isoform OS=Saccharomyces cerevisiae (strain ATCC 204508 / S288c) GN=VPH1 PE=1 SV=3	602
	PST79_7492	v-type	74.62	96.46		ATPase V1 complex subunit H		0	EFP84421	hypothetical protein PGTG_10141 [Puccinia graminis f. sp. tritici CRL 75-36-700-3]	322	1.65e-50	V-type proton ATPase subunit H OS=Homo sapiens GN=ATP6V1H PE=1 SV=1	287
	PST79_12167	v-type	2.71	43.02	SPO	vacuolar (H+)-ATPase		0	EFP86846	V-type H+-transporting ATPase subunit I [Puccinia graminis f. sp. tritici CRL 75-36-700-3]	361	3.83e-41	V-type proton ATPase 116 kDa subunit a isoform 1 OS=Homo sapiens GN=ATP6V0A1 PE=1 SV=3	312
	PST79_4659	v-type	49.71	88.62		vacuolar (H+)-ATPase		0	EFP89798	V-type proton ATPase catalytic subunit A [Puccinia graminis f. sp. tritici CRL 75-36-700-3]	623	0	V-type proton ATPase catalytic subunit A OS=Homo sapiens GN=ATP6V1A PE=1 SV=2	610
	PST79_1247	v-type	177.8	158.89		vacuolar H+ ATP synthase 16 kDa		2.59e-94	EFP84286	V-type proton ATPase proteolipid subunit [Puccinia graminis f. sp. tritici CRL 75-36-700-3]	171	4.07e-54	V-type proton ATPase subunit c OS=Saccharomyces cerevisiae (strain ATCC 204508 / S288c) GN=VMA3 PE=1 SV=1	163
	PST79_701	v-type	70.22	88.79		vacuolar H+ ATP synthase 16 kDa		6.2e-90	XP_003332108	hypothetical protein PGTG_13475 [Puccinia graminis f. sp. tritici CRL 75-36-700-3] >gi|309311098|gb|EFP87689.1| V-type H+-transporting ATPase 16kDa proteolipid subunit [Puccinia graminis f. sp. tritici CRL 75-36-700-3]	171	1.22e-37	V-type proton ATPase subunit c' OS=Saccharomyces cerevisiae (strain ATCC 204508 / S288c) GN=VMA11 PE=1 SV=1	154
Other transporters
	PST79_10023	Mitochondrial folate carrier	20.98	150.56	SPO			0	XP_003326976	flavin-adenine dinucleotide transporter [Puccinia graminis f. sp. tritici CRL 75-36-700-3] >gi|309305966|gb|EFP82557.1| hypothetical protein PGTG_08753 [Puccinia graminis f. sp. tritici CRL 75-36-700-3]	412	1.21e-51	Mitochondrial folate transporter/carrier OS=Homo sapiens GN=SLC25A32 PE=1 SV=2	367
	PST79_11336	Fucose transporter	5.38	351.58	SPO	GDP-fucose transporter 1 OS=Homo sapiens GN=SLC35C1 PE=1 SV=1		0	XP_003336007	GDP-fucose transporter 1 [Puccinia graminis f. sp. tritici CRL 75-36-700-3] >gi|309314997|gb|EFP91588.1| hypothetical protein PGTG_17642 [Puccinia graminis f. sp. tritici CRL 75-36-700-3]	351	5.41e-36	GDP-fucose transporter 1 OS=Homo sapiens GN=SLC35C1 PE=1 SV=1	321
	PST79_11845	Fucose transporter	4.08	39.3	SPO			2.99e-78	EHS63869	hypothetical protein PGTG_20851 [Puccinia graminis f. sp. tritici CRL 75-36-700-3]	261	7.42e-16	GDP-fucose transporter 1 OS=Homo sapiens GN=SLC35C1 PE=1 SV=1	203
	PST79_4382	Protein transporter	221.05	40.34	HAUS			0	EHS63352	protein transporter SEC61 subunit alpha, variant [Puccinia graminis f. sp. tritici CRL 75-36-700-3] >gi|375167230|gb|EFP83185.2| protein transporter SEC61 subunit alpha [Puccinia graminis f. sp. tritici CRL 75-36-700-3]	482	2.67e-167	Protein transport protein Sec61 subunit alpha isoform 1 OS=Homo sapiens GN=SEC61A1 PE=1 SV=2	470
	PST79_5204	Ammonium transporter	30.6	42.49		Ammonium transporter OS=Hebeloma cylindrosporum GN=Amt1 PE=2 SV=1		0	XP_003330728	ammonium transporter 1 [Puccinia graminis f. sp. tritici CRL 75-36-700-3]	306	2.37e-153	Ammonium transporter OS=Hebeloma cylindrosporum GN=Amt1 PE=2 SV=1	264
	PST79_5773	Arsenical transporter	6.07	66.62	SPO	Arsenical pump efflux		0	EFP81721	hypothetical protein PGTG_07970 [Puccinia graminis f. sp. tritici CRL 75-36-700-3]	679
